# Supplementary material for: Atomic structures and functional implications of the archaeal RecQ-like helicase Hjm
Source: PubMed Central journal article supplement (PMC2636818; doi:10.1186/1472-6807-9-2), 2009-01-22

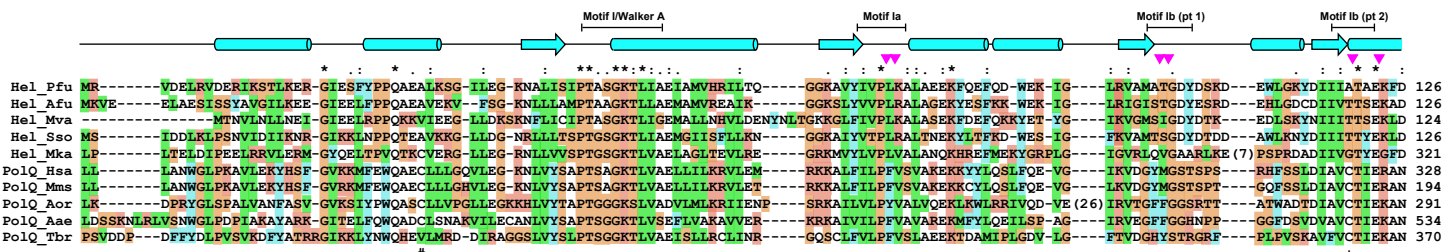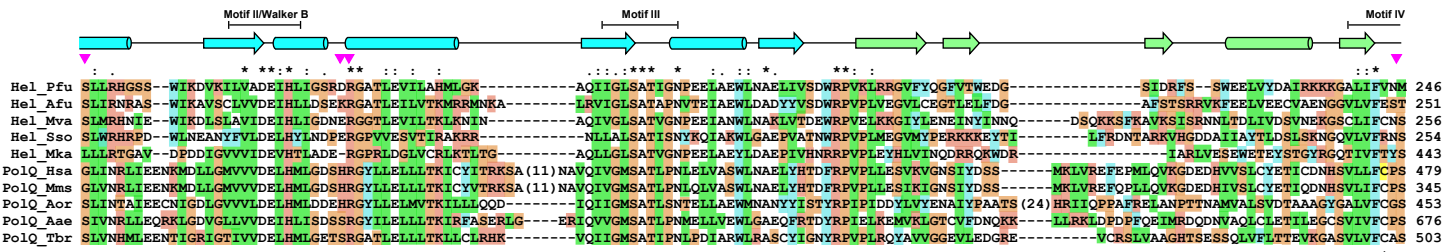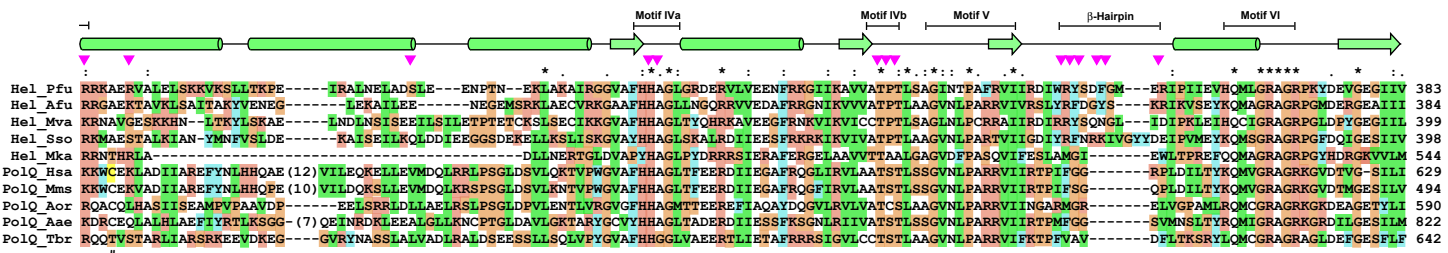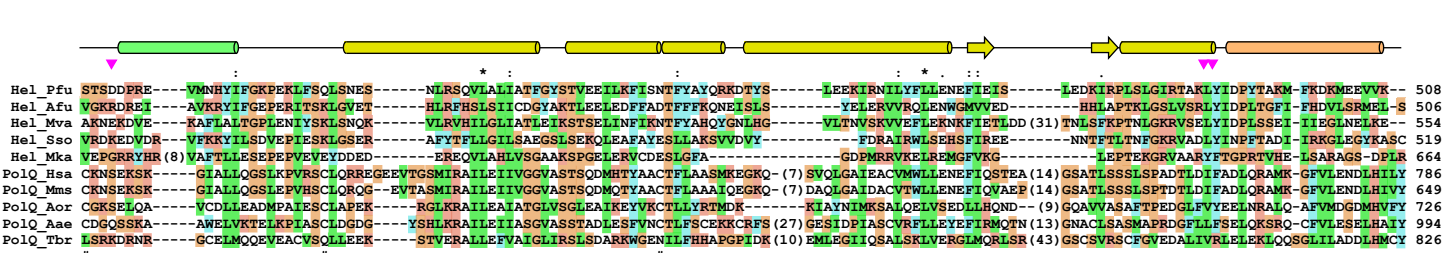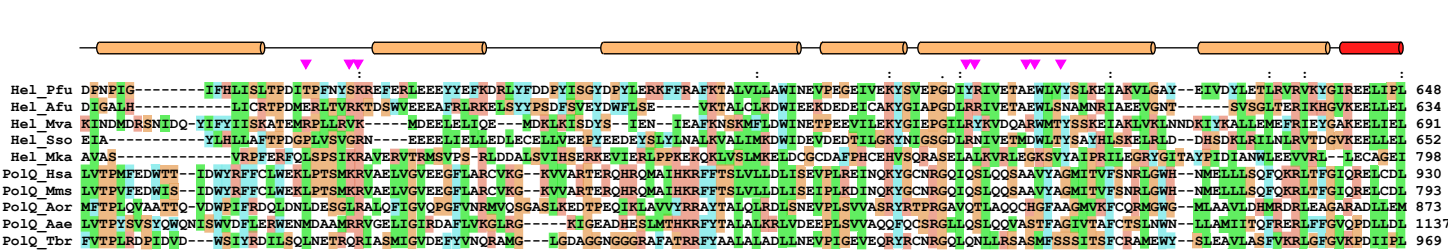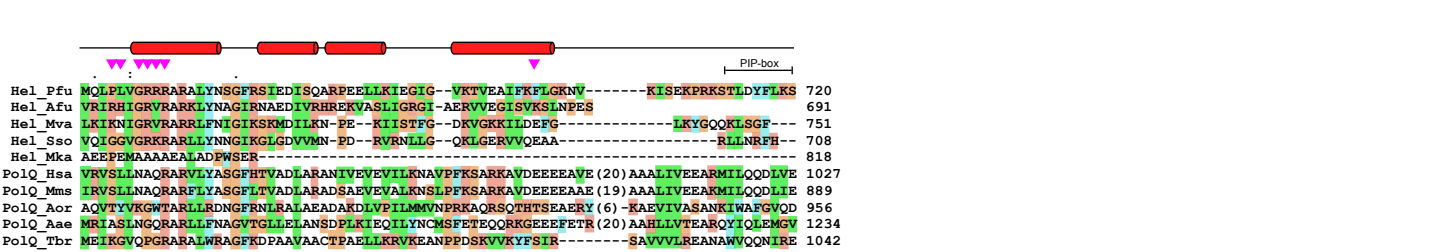

Supplement: 1472-6807-9-2-S1.pdf [file 1472-6807-9-2-S1.pdf]
